# Supplementary material for: Wolbachia Infections in Aedes aegypti Differ Markedly in Their Response to Cyclical Heat Stress
Source: PLoS Pathog. 2017 Jan 5;13(1):e1006006. doi: 10.1371/journal.ppat.1006006 (PMC5215852; doi:10.1371/journal.ppat.1006006)
Supplement: S1 Table — (PDF) [file ppat.1006006.s003.pdf]

**S1 Table. Primers used in qPCR.**

| Specificity          | Name      | Sequence (5'-3')            | Reference |
|----------------------|-----------|-----------------------------|-----------|
| <i>Aedes</i>         | mRpS6_F   | AGTTGAACGTATCGTTTCCCGCTAC   | (1)       |
|                      | mRpS6_R   | GAAGTGACGCAGCTTGTGGTCGTCC   |           |
| <i>Aedes aegypti</i> | aRpS6_F   | ATCAAGAAGCGCCGTGTCTG        | (1)       |
|                      | aRpS6_R   | CAGGTGCAGGATCTTCATGTATTCG   |           |
| <i>wMel</i>          | w1_F      | AAAATCTTTGTGAAGAGGTGATCTGC  | (1)       |
|                      | w1_R      | GCACTGGGATGACAGGAAAAGG      |           |
| <i>wMelPop-CLA</i>   | wMelpop_F | CTCATCTTTACCCCGTACTAAAATTTC | (2)       |
|                      | wMelpop_R | TCTTCCTCATTAAGAACCTCTATCTTG |           |
| <i>wAlbB</i>         | wAlbB_F   | CCTTACCTCCTGCACAACAA        | (3)       |
|                      | wAlbB_R   | GGATTGTCCAGTGGCCTTA         |           |

qPCR = quantitative real-time polymerase chain reaction.

**S1 Table references**

1. Lee SF, White VL, Weeks AR, Hoffmann AA, Endersby NM. High-throughput PCR assays to monitor *Wolbachia* infection in the dengue mosquito (*Aedes aegypti*) and *Drosophila simulans*. Applied and environmental microbiology. 2012;78(13):4740-3.
2. Ritchie SA, Townsend M, Paton CJ, Callahan AG, Hoffmann AA. Application of *wMelPop* *Wolbachia* strain to crash local populations of *Aedes aegypti*. PLoS neglected tropical diseases. 2015;9(7):e0003930.
3. Axford JK, Ross PA, Yeap HL, Callahan AG, Hoffmann AA. Fitness of *wAlbB* *Wolbachia* Infection in *Aedes aegypti*: Parameter Estimates in an Outcrossed Background and Potential for Population Invasion. The American journal of tropical medicine and hygiene. 2016;94(3):507-16.
